# Supplementary material for: A Critical Appraisal of the Diagnostic and Prognostic Utility of the Anti-Inflammatory Marker IL-37 in a Clinical Setting: A Case Study of Patients with Diabetes Type 2
Source: Int J Environ Res Public Health. 2023 Feb 19;20(4):3695. doi: 10.3390/ijerph20043695 (PMC9966907; doi:10.3390/ijerph20043695)
Supplement: Supplementary file 1 [file ijerph-20-03695-s001.zip › Table S1.pdf]

**Table S1a.** Patient characteristics (numerical variables).

| Variable                                   | Median (IQR)   | Mean (SD)   |
|--------------------------------------------|----------------|-------------|
| Age (years)                                | 66.00 (12.00)  |             |
| Wc (cm)                                    | 103.00 (13.00) |             |
| Mac (cm)                                   | 30.00 (4.00)   |             |
| BMI                                        | 29.72 (6.18)   |             |
| HbA1C (%)                                  | 6.90 (1.70)    |             |
| Diabetes duration (years)                  | 8.00 (10.00)   |             |
| Hypertension duration (years)              | 10.00 (8.00)   |             |
| Erythrocyte number (x 10 <sup>12</sup> /L) |                | 4.79 (0.44) |
| Haematocrit (%)                            | 42.30 (4.70)   |             |
| Glucose (mmol/L)                           | 7.95 (3.18)    |             |
| Total cholesterol (mmol/L)                 | 5.20 (1.70)    |             |
| LDL (mmol/L)                               |                | 3.21 (1.04) |
| HDL (mmol/L)                               | 1.31 (0.40)    |             |
| Triglycerides (mmol/L)                     | 1.73 (0.90)    |             |
| TSH (mIU/L)                                | 2.52 (1.70)    |             |
| Uric acid (μmol/L)                         | 320.00 (80.00) |             |

Wc = waist circumference; Mac = mid arm circumference; LDL = Low-density lipoprotein; HDL = High-density lipoprotein; TSH = thyroid-stimulating hormone

**Table S1b.** Patient characteristics (categorical variables).

| Variable                                           | Absolute No.                     |
|----------------------------------------------------|----------------------------------|
|                                                    | 50-65 = 79                       |
| Age (years)                                        | 66-75 = 63                       |
|                                                    | >75 = 28                         |
| Gender (M,F)                                       | M = 44%                          |
|                                                    | <25 = 20                         |
| BMI (kg/m <sup>2</sup> )                           | 25-30 = 67                       |
|                                                    | >30 = 83                         |
| Nutritional status (MNA-test screening score)      | at risk for malnutrition = 15.3% |
|                                                    | Never = 68                       |
| Smoking habit                                      | Current = 31                     |
|                                                    | Ex = 71                          |
| Self-reported walking difficulties                 | Yes = 89.4%                      |
|                                                    | 0 = 97                           |
| frailty index (0 = robust; 1 = prefrail; 2 –frail) | 1 = 42                           |
|                                                    | 2 = 31                           |
| Metabolic Syndrome                                 | Yes = 32.9%                      |
| (M)                                                | Yes = 54.1%                      |
| (F)                                                |                                  |
|                                                    | <6.5 = 45                        |
| HbA1C (%)                                          | ≥6.5 <7.5 = 60                   |
|                                                    | ≥7.5<8.5 = 32                    |
|                                                    | ≥8.5 = 33                        |

|                                                                                           |                                                      |
|-------------------------------------------------------------------------------------------|------------------------------------------------------|
| eGFR (ml/min/1.73 m <sup>2</sup> )                                                        | <45 = 14<br><60 ≥45 = 39<br>≥60 <90 = 63<br>>90 = 54 |
| Diabetes duration (years)                                                                 | 1-3y = 55<br>4-10y = 57<br>11-20y = 51<br>>20y = 7   |
| Hypertension duration (years)                                                             | 1-5y = 27<br>6-10y = 62<br>11-20y = 76<br>>20y = 5   |
| No. of comorbidities                                                                      | ≤3 = 4.7%                                            |
| Hypertension                                                                              | Yes = 89.4%                                          |
| One or more of: CAD, CHD, Cerebrovascular Dis.,<br>Periphery Artery Dis.                  | Yes = 51.2%                                          |
| CAD (Coronary Artery Dis.)                                                                | Yes = 34.7%                                          |
| CHD (Chronic Heart Dis.)                                                                  | Yes = 48.8%                                          |
| Diabetic retinopathy                                                                      | Yes = 28.2%                                          |
| Chronic respiratory disease (chronic obstructive<br>pulmonary dis. or asthma)             | Yes = 8.2%                                           |
| Gastro-intestinal dis.                                                                    | Yes = 42.4%                                          |
| Osteoporosis                                                                              | Yes = 45.9%                                          |
| Osteoarthritis                                                                            | Yes = 50.6%                                          |
| Low back pain                                                                             | Yes = 65.3%                                          |
| Thyroid gland dis.                                                                        | Yes = 19.4%                                          |
| Urogenital dis.                                                                           | Yes = 29.4%                                          |
| Incontinentio urinae                                                                      | Yes = 15.3%                                          |
| Anxious disorders                                                                         | Yes = 60.6%                                          |
| Total No. of medications prescribed                                                       | ≤3 = 5.3%                                            |
| Metformin                                                                                 | Yes = 72.9%                                          |
| Sulfonylureas                                                                             | Yes = 22.4%                                          |
| Pioglitazone                                                                              | Yes = 5.9%                                           |
| Metformin, Sulfonylureas, Pioglitazone = altogether<br>(Old fashioned oral antidiabetics) | Yes = 84.70%                                         |
| Dipeptidyl peptidase-4 inhibitor (DPP4)                                                   | Yes = 17.6%                                          |
| Glucagon-like peptide-1 receptor agonist (GLP1)                                           | Yes = 8.8%                                           |

|                                                                         |             |
|-------------------------------------------------------------------------|-------------|
| Sodium-glucose co-transporter-2 (SGLT2)                                 | Yes = 3.5%  |
| DPP4, GLP1ra, SGLT2-inh = altogether (New fashioned oral antidiabetics) | Yes = 30.0% |
| Insulin therapy                                                         | Yes = 23.5% |
| ACE-INH or ARBs                                                         | Yes = 78.2% |
| Calcium channel blockers                                                | Yes = 42.4% |
| Beta-blockers                                                           | Yes = 45.3% |
| Diuretics                                                               | Yes = 66.5% |
| Statins                                                                 | Yes = 84.1% |
| NSAID                                                                   | Yes = 71.2% |

BMI = body mass index; MNA = test screening score = Mini Nutritional Assessment test screening; HbA1C = hemoglobinA1C; eGFR = estimated glomerular filtration rate; CVD = cardiovascular disease; CAD = coronary artery disease; CHD = chronic heart disease; DPP4inh = dipeptidyl peptidase-4 inhibitor; GLP1ra = glucagon-like peptide-1 receptor agonists; SGLT2inh = sodium-glucose cotransporter 2 inhibitors; ACE-INH = Angiotensin converting enzyme inhibitors; ARBs = Angiotensin receptor blockers; NSAID = Non-steroidal anti-inflammatory drugs.
