# Supplementary material for: A Critical Appraisal of the Diagnostic and Prognostic Utility of the Anti-Inflammatory Marker IL-37 in a Clinical Setting: A Case Study of Patients with Diabetes Type 2
Source: Int J Environ Res Public Health. 2023 Feb 19;20(4):3695. doi: 10.3390/ijerph20043695 (PMC9966907; doi:10.3390/ijerph20043695)
Supplement: Supplementary file 1 [file ijerph-20-03695-s001.zip › Table S2.pdf]

**Table S2.** Differences in distributions of examined variables among quartiles of IL-37. Numerical variables.

| Variable                    | 1 <sup>st</sup> quartile<br>41 records | 2 <sup>nd</sup> quartile<br>41 records | 3 <sup>rd</sup> quartile<br>44 records | 4 <sup>th</sup> quartile<br>44 records | p-value | Post hoc test |           |
|-----------------------------|----------------------------------------|----------------------------------------|----------------------------------------|----------------------------------------|---------|---------------|-----------|
| No. of lymphocytes          | 2.64 (0.90)*                           | 2.56 (0.79)                            | 3.30 (5.39)*                           | 2.62 (1.06)*                           | 0.88**  |               |           |
| No. of neutrophils          | 4.00 (0.74)                            | 4.10 (1.32)                            | 5.07 (6.70)*                           | 4.23 (1.59)*                           | 0.98**  |               |           |
| Lymphocyte %                | 33.80 (9.90)                           | 34.20 (11.50)                          | 33.20 (9.53)                           | 32.90 (13.98)                          | 0.74**  |               |           |
| Neutrophils%                | 52.80 (10.60)                          | 53.20 (10.80)                          | 53.50 (8.90)                           | 54.50 (15.88)                          | 0.79**  |               |           |
| NLR                         | 1.59 (0.84)                            | 1.51 (0.80)                            | 1.83 (0.89)*                           | 1.80 (0.79)*                           | 0.73**  |               |           |
| CRP                         | 2.18 (1.92)*                           | 2.39 (1.93)*                           | 3.14 (2.82)*                           | 3.61 (3.65)*                           | 0.38*** |               |           |
| eGFR                        | 84.00 (43.00)                          | 83.00 (43.00)                          | 84.50 (35.00)                          | 76.61 (25.09)*                         | 0.39**  |               |           |
| Age                         | 67.46 (9.62)*                          | 64.95 (7.84)*                          | 69.07 (8.83)*                          | 67.07 (8.14)*                          | 0.18*** |               |           |
| Waist circumference         | 106.00 (8.00)                          | 100.00 (15.00)                         | 103.34 (10.84)*                        | 103.80 (12.10)*                        | 0.44**  |               |           |
| mac                         | 29.00 (3.00)                           | 29.00 (4.00)                           | 30.34 (2.88)*                          | 30.30 (3.14)*                          | 0.12**  |               |           |
| Diabetes duration           | 10.00 (12.00)                          | 10.00 (11.00)                          | 5.00 (9.75)                            | 9.00 (7.25)                            | 0.64**  |               |           |
| Hypertension duration       | 12.00 (7.00)                           | 10.00 (6.00)                           | 10.00 (8.00)                           | 11.34 (5.20)*                          | 0.28**  |               |           |
| BMI                         | 29.21 (4.40)                           | 28.83 (6.72)                           | *30.40 (3.92)                          | 29.04 (7.97)                           | 0.67**  |               |           |
| Total Leukocyte Erythrocyte | 7.58 (1.45)*                           | 7.53 (1.55)*                           | 7.38 (1.72)*                           | 7.82 (2.26)*                           | 0.77**  |               |           |
|                             |                                        |                                        |                                        |                                        |         | 1-0           | 0.96****  |
|                             |                                        |                                        |                                        |                                        |         | 2-0           | 0.99      |
|                             |                                        |                                        |                                        |                                        |         | 3-0           | 0.08      |
|                             | 4.48 (0.37)*                           | 4.89 (0.43)*                           | 4.81 (0.46)*                           | 4.62 (0.46)*                           | 0.02*** | 2-1           | 0.86      |
|                             |                                        |                                        |                                        |                                        |         | 3-1           | 0.02*     |
|                             |                                        |                                        |                                        |                                        |         | 3-2           | 0.15      |
| LDL                         |                                        |                                        |                                        |                                        |         | 1-0           | 0.04****  |
|                             |                                        |                                        |                                        |                                        |         | 2-0           | 0.07      |
|                             | 2.84 (1.08)*                           | 3.45 (1.04)*                           | 3.38 (1.04)*                           | 3.18 (0.94)*                           | 0.04*** | 3-0           | 0.43      |
|                             |                                        |                                        |                                        |                                        |         | 2-1           | 0.99      |
|                             |                                        |                                        |                                        |                                        |         | 3-1           | 0.62      |
|                             |                                        |                                        |                                        |                                        |         | 3-2           | 0.78      |
| HDL                         | 1.29 (0.35)                            | 1.40 (0.50)                            | 1.40 (0.49)                            | 1.30 (0.30)                            | 0.09**  |               |           |
| Hemoglobin                  |                                        |                                        |                                        |                                        |         | 1-0           | 1.00***** |
|                             |                                        |                                        |                                        |                                        |         | 2-0           | 1.00      |
|                             | 143.80 (10.68)*                        | 148.00 (16.00)                         | 140.20 (14.65)*                        | 139.60 (12.86)*                        | 0.03**  | 3-0           | 0.65      |
|                             |                                        |                                        |                                        |                                        |         | 2-1           | 0.16      |
|                             |                                        |                                        |                                        |                                        |         | 3-1           | 0.03*     |
|                             |                                        |                                        |                                        |                                        |         | 3-2           | 1.00      |
| Hematocrit                  |                                        |                                        |                                        |                                        |         | 1-0           | 1.00***** |
|                             |                                        |                                        |                                        |                                        |         | 2-0           | 1.00      |
|                             | 42.64 (2.97)*                          | 43.20 (3.90)                           | 41.72 (4.17)*                          | 41.49 (3.52)*                          | 0.04**  | 3-0           | 0.60      |
|                             |                                        |                                        |                                        |                                        |         | 2-1           | 0.25      |
|                             |                                        |                                        |                                        |                                        |         | 3-1           | 0.04*     |
|                             |                                        |                                        |                                        |                                        |         | 3-2           | 1.00      |
| Glucose                     | 2.90 (3.60)                            | 8.10 (3.00)                            | 7.35 (2.05)                            | 7.65 (2.83)                            | 0.10**  |               |           |
| HbA1C                       | 7.68 (1.28)*                           | 6.90 (1.90)                            | 6.80 (1.33)                            | 6.70 (1.53)                            | 0.06**  | 1-0           | 1.00***** |

|               |              |              |                |                |        |            |      |
|---------------|--------------|--------------|----------------|----------------|--------|------------|------|
|               |              |              |                |                |        | 2-0        | 0.25 |
|               |              |              |                |                |        | 3-0        | 0.19 |
|               |              |              |                |                |        | 2-1        | 0.58 |
|               |              |              |                |                |        | <b>3-1</b> | 0.45 |
|               |              |              |                |                |        | 3-2        | 1.00 |
| Triglycerides | 1.60 (1.17)  | 1.77 (0.61)  | 1.83 (1.47)    | 1.77 (1.03)    | 0.32** |            |      |
| Cholesterol   | 4.95 (1.38)* | 5.57 (1.32)* | 5.57 (1.42)*   | 5.00 (0.98)    | 0.15** |            |      |
| TSH           | 2.80 (1.90)  | 2.35 (1.86)  | 3.03 (2.01)    | 2.41 (1.38)    | 0.29** |            |      |
| Uric acid     | 315.00       | 326.80       | 322.50 (82.50) | 330.00 (88.25) | 0.40** |            |      |
|               | (54.71)*     | (62.84)*     |                |                |        |            |      |

Median (IQR)

\*Mean (SD) – normally distributed

\*\*Kruskal-Wallis rank sum test (the p-value is less than the significance level 0.05, we can conclude that there are significant differences between the groups)

\*\*\*ANOVA test (p-value is less than the significance level 0.05, we can conclude that there are significant differences between the groups)

\*\*\*\* ANOVA post hoc test (Tukey's test) (significant difference with p-value less than 0.05)

\*\*\*\*\* KW post hoc test (Dunn's test with a Bonferroni correction) (significant difference with p-value less than 0.05)

Bolded – significant differences
