# Supplementary material for: A Critical Appraisal of the Diagnostic and Prognostic Utility of the Anti-Inflammatory Marker IL-37 in a Clinical Setting: A Case Study of Patients with Diabetes Type 2
Source: Int J Environ Res Public Health. 2023 Feb 19;20(4):3695. doi: 10.3390/ijerph20043695 (PMC9966907; doi:10.3390/ijerph20043695)
Supplement: Supplementary file 1 [file ijerph-20-03695-s001.zip › Table S3.pdf]

**Table S3.** Differences in distributions of examined variables among quartiles of IL-37. Categorical variables.

| Variable                            | 1 <sup>st</sup> quartile<br>41 records | 2 <sup>nd</sup> quartile<br>41 records | 3 <sup>rd</sup> quartile<br>44 records | 4 <sup>th</sup> quartile<br>44 records | Total<br>170 records | p-value |
|-------------------------------------|----------------------------------------|----------------------------------------|----------------------------------------|----------------------------------------|----------------------|---------|
| eGFR                                |                                        |                                        |                                        |                                        |                      |         |
| <60                                 | 11 (26.8%)                             | 13 (31.7%)                             | 16 (39.0%)                             | 13 (29.5%)                             | 53 (31.2%)           | 0.78    |
| 60-90                               | 14 (34.1%)                             | 15 (36.6%)                             | 14 (31.8%)                             | 20 (45.5%)                             | 63 (37.0%)           |         |
| >90)                                | 16 (39.0%)                             | 13 (31.7%)                             | 14 (31.8%)                             | 11 (25.0%)                             | 54 (31.8%)           |         |
| frailty index                       |                                        |                                        |                                        |                                        |                      |         |
| 0                                   | 17 (41.4%)                             | 28 (68.3%)                             | 22 (50.0%)                             | 30 (68.2%)                             | 97 (57.1%)           | 0.11    |
| 1                                   | 15 (36.6%)                             | 8 (19.5%)                              | 11 (25.0%)                             | 8 (18.2%)                              | 42 (24.7%)           |         |
| 2                                   | 9 (22.0%)                              | 5 (12.2%)                              | 11 (25.0%)                             | 6 (13.6%)                              | 31 (18.2%)           |         |
| Gender = Male                       | 21 (51.2%)                             | 20 (48.9%)                             | 15 (34.1%)                             | 19 (43.2%)                             | 74 (43.5%)           | 0.39    |
| Age                                 |                                        |                                        |                                        |                                        |                      |         |
| 50-65                               | 16 (39.0%)                             | 23 (56.2%)                             | 19 (43.2%)                             | 21 (47.8%)                             | 79 (46.5%)           | 0.46    |
| 66-75                               | 18 (43.9%)                             | 14 (34.1%)                             | 14 (31.8%)                             | 17 (38.6%)                             | 63 (37.0%)           |         |
| >75                                 | 7 (17.1%)                              | 4 (9.7%)                               | 11 (25.0%)                             | 6 (13.6%)                              | 28 (16.5%)           |         |
| HbA1C                               |                                        |                                        |                                        |                                        |                      |         |
| <6.5                                | 8 (19.5%)                              | 9 (22.0%)                              | 13 (29.5%)                             | 15 (34.1%)                             | 45 (26.5%)           | 0.08    |
| ≥6.5<7.5                            | 12 (29.2%)                             | 15 (36.6%)                             | 17 (38.6%)                             | 16 (36.4%)                             | 60 (35.3%)           |         |
| ≥7.5<8.5                            | 9 (22.1%)                              | 4 (9.7%)                               | 9 (20.5%)                              | 10 (22.7%)                             | 32 (18.8%)           |         |
| ≥8.5                                | 12 (29.2%)                             | 13 (31.7%)                             | 5 (11.4%)                              | 3 (6.8%)                               | 33 (19.4%)           |         |
| Smoking                             |                                        |                                        |                                        |                                        |                      |         |
| Never                               | 16 (39.0%)                             | 14 (34.1%)                             | 22 (50.0%)                             | 16 (39.0%)                             | 68 (40.0%)           | 0.19    |
| Current + Ex                        | 25 (61.0%)                             | 27 (65.9%)                             | 22 (50.0%)                             | 28 (63.6%)                             | 102 (60.0%)          |         |
| BMI                                 |                                        |                                        |                                        |                                        |                      |         |
| <25                                 | 6 (14.6%)                              | 6 (14.6%)                              | 5 (11.4%)                              | 3 (6.8%)                               | 20 (11.8%)           | 0.69*   |
| 25-30                               | 16 (39.0%)                             | 16 (39.0%)                             | 13 (29.5%)                             | 22 (50.0%)                             | 67 (39.4%)           |         |
| >30                                 | 19 (46.4%)                             | 19 (46.4%)                             | 26 (59.1%)                             | 19 (43.2%)                             | 83 (48.8%)           |         |
| Nutritional<br>screening score<br>= |                                        |                                        |                                        |                                        |                      | 0.57    |
| normal                              | 32 (78.0%)                             | 35 (85.4%)                             | 39 (88.6%)                             | 38 (86.4%)                             | 144 (84.7%)          | 0.65    |
| nutritional state                   |                                        |                                        |                                        |                                        |                      |         |
| NSAID = Yes                         | 30 (73.2%)                             | 28 (68.3%)                             | 29 (65.9%)                             | 34 (77.3%)                             | 121 (71.2%)          | 0.15*   |
| Chronic                             |                                        |                                        |                                        |                                        |                      |         |
| obstructive                         | 6 (14.6%)                              | 2 (4.9%)                               | 3 (6.8%)                               | 3 (6.8%)                               | 14 (8.2%)            | 0.92    |
| pulmonary dis.                      |                                        |                                        |                                        |                                        |                      |         |
| Or asthma = Yes                     |                                        |                                        |                                        |                                        |                      | 0.92    |
| CVD or                              |                                        |                                        |                                        |                                        |                      |         |
| Cerebrovascular                     | 11 (26.8%)                             | 9 (22.1%)                              | 12 (27.3%)                             | 10 (22.7%)                             | 42 (24.7%)           | 0.92    |
| D. = Yes                            |                                        |                                        |                                        |                                        |                      |         |
| CAD = Yes                           | 7 (17.1%)                              | 12 (29.2%)                             | 18 (40.9%)                             | 22 (50.0%)                             | 59 (34.7%)           | < 0.01  |
| CHD = Yes                           | 14 (34.1%)                             | 1 (2.4%)                               | 22 (50.0%)                             | 27 (61.4%)                             | 64 (37.6%)           | 0.08    |
| Gastro-intestinal<br>dis. = Yes     | 8 (19.5%)                              | 19 (46.4%)                             | 22 (50.0%)                             | 23 (52.3%)                             | 72 (42.4%)           | < 0.01  |

|                                                 |            |            |            |            |             |                  |
|-------------------------------------------------|------------|------------|------------|------------|-------------|------------------|
| Osteoporosis =<br>Yes                           | 5 (12.2%)  | 9 (22.0%)  | 11 (25.0%) | 13 (29.5%) | 38 (22.4%)  | 0.27             |
| Osteoarthritis =<br>Yes                         | 17 (41.4%) | 22 (53.7%) | 21 (47.7%) | 26 (59.1%) | 86 (50.6%)  | 0.40             |
| Low back pain =<br>Yes                          | 28 (68.3%) | 25 (61.0%) | 28 (63.6%) | 30 (68.2%) | 121 (71.2%) | 0.87             |
| Thyroid gland<br>dis. = Yes                     | 9 (22.0%)  | 9 (22.0%)  | 7 (15.9%)  | 8 (18.2%)  | 33 (19.4%)  | 0.87             |
| Incontinentio<br>urinae = Yes                   | 3 (7.3%)   | 4 (9.7%)   | 11 (25.0%) | 8 (18.2%)  | 26 (15.3%)  | 0.09             |
| Urogenital dis =<br>Yes                         | 10 (24.4%) | 12 (29.2%) | 13 (29.5%) | 15 (34.1%) | 50 (29.4%)  | 0.81             |
| Anxiety = Yes                                   | 18 (43.9%) | 27 (65.9%) | 30 (68.2%) | 27 (61.4%) | 102 (60.0%) | 0.10             |
| Diabetic<br>retinopathy =<br>Yes                | 12 (29.2%) | 13 (31.7%) | 14 (31.8%) | 9 (20.5%)  | 48 (28.2%)  | 0.60             |
| Metformin = Yes                                 | 32 (78.0%) | 27 (65.9%) | 31 (70.5%) | 34 (77.3%) | 124 (72.9%) | 0.54             |
| Sulfonylureas =<br>Yes                          | 9 (22.0%)  | 8 (19.5%)  | 9 (20.5%)  | 12 (27.3%) | 38 (22.4%)  | 0.83             |
| Pioglitazone =<br>Yes                           | 1 (2.4%)   | 3 (7.3%)   | 3 (6.8%)   | 3 (6.8%)   | 10 (5.9%)   | 0.32*            |
| Old fashioned<br>oral<br>antidiabetics =<br>Yes | 34 (82.9%) | 33 (80.5%) | 37 (84.1%) | 40 (90.9%) | 144 (84.7%) | 0.58             |
| DPP4 = Yes                                      | 12 (29.2%) | 8 (19.5%)  | 6 (13.6%)  | 4 (9.1%)   | 30 (17.6%)  | 0.09             |
| SGLT2-inh = Yes                                 | 3 (7.3%)   | 1 (2.4%)   | 2 (4.5%)   | 0 (0.0%)   | 6 (3.5%)    | 0.24*            |
| GLP1ra = Yes                                    | 6 (14.6%)  | 4 (9.7%)   | 3 (6.8%)   | 2 (4.5%)   | 15 (8.8%)   | 0.68*            |
| New fashioned<br>oral<br>antidiabetics =<br>Yes | 21 (51.2%) | 13 (31.7%) | 11 (25.0%) | 6 (13.6%)  | 51 (30.0%)  | <b>&lt; 0.01</b> |
| Insulin = Yes                                   | 10 (24.4%) | 11 (26.8%) | 11 (25.0%) | 8 (18.2%)  | 40 (23.5%)  | 0.80             |
| ACE-INH or<br>ARBs = Yes                        | 32 (78.0%) | 30 (73.2%) | 37 (84.1%) | 34 (77.3%) | 133 (78.2%) | 0.68             |
| Calcium channel<br>blockers = Yes               | 14 (34.1%) | 18 (43.9%) | 20 (45.5%) | 20 (45.5%) | 72 (42.4%)  | 0.68             |
| Diuretics = Yes                                 | 26 (63.4%) | 26 (63.4%) | 31 (70.5%) | 29 (65.9%) | 112 (65.9%) | 0.89             |
| Beta-blockers =<br>Yes                          | 14 (34.1%) | 18 (43.9%) | 23 (52.3%) | 21 (47.8%) | 76 (44.7%)  | 0.39             |
| Hyperlipidemia<br>(statins therapy)<br>= yes    | 35 (85.4%) | 33 (80.5%) | 36 (81.9%) | 39 (88.6%) | 141 (82.9%) | 0.73             |
| Number of<br>comorbidities<br>≤3                | 38 (92.7%) | 38 (92.7%) | 44 (100%)  | 42 (95.5%) | 162 (95.3%) | 0.40*            |
| Number of<br>medications<br>prescribed<br>≤3    | 39 (95.1%) | 38 (92.7%) | 42 (95.5%) | 42 (95.5%) | 161 (94.7%) | 0.38*            |

|                                   |            |            |            |            |            |       |
|-----------------------------------|------------|------------|------------|------------|------------|-------|
| Metabolic<br>Syndrome<br>(Male)   | 15 (36.6%) | 13 (31.7%) | 15 (34.1%) | 13 (29.5%) | 56 (32.9%) | 0.66* |
| Metabolic<br>Syndrome<br>(Female) | 19 (46.3%) | 26 (63.4%) | 21 (47.7%) | 26 (59.1%) | 92 (54.1%) | 0.32* |

---

Pearson's chi-squared test

\*Fisher test
