# Supplementary material for: A Critical Appraisal of the Diagnostic and Prognostic Utility of the Anti-Inflammatory Marker IL-37 in a Clinical Setting: A Case Study of Patients with Diabetes Type 2
Source: Int J Environ Res Public Health. 2023 Feb 19;20(4):3695. doi: 10.3390/ijerph20043695 (PMC9966907; doi:10.3390/ijerph20043695)
Supplement: Supplementary file 1 [file ijerph-20-03695-s001.zip › Table S4.pdf]

**Table S4.** Optimal cut-off values of IL-37 and other markers of inflammation for discriminating between subgroups of patients diagnosed with T2D concerning measures: sensitivity, specificity, negative predictive value, and positive predictive value (ROC-analysis).

| subgroups                                                                                     | NLR               | CRP  | Hb   | IL-37 |
|-----------------------------------------------------------------------------------------------|-------------------|------|------|-------|
| eGFR <60/≥60                                                                                  | Cutoff value: 2.4 | 5.2  | 130  | 7.2   |
|                                                                                               | Sensitivity: 0.32 | 0.23 | 0.89 | 0.74* |
|                                                                                               | Specificity: 0.90 | 0.87 | 0.28 | 0.40  |
|                                                                                               | NPV: 0.75         | 0.72 | 0.54 | 0.77  |
|                                                                                               | PPV: 0.59         | 0.44 | 0.73 | 0.35  |
| eGFR <45/≥45                                                                                  | Cutoff value: 1.5 | 2.1  | 134  | 13.2  |
|                                                                                               | Sensitivity: 0.86 | 0.86 | 0.79 | 0.79  |
|                                                                                               | Specificity: 0.45 | 0.57 | 0.64 | 0.47  |
|                                                                                               | NPV: 0.97         | 0.98 | 0.21 | 0.96  |
|                                                                                               | PPV: 0.12         | 0.15 | 0.96 | 0.12  |
| Frailty index 1 or 2 / 0                                                                      | 3.09              | 1.2  | 135  | 3.4   |
|                                                                                               | 0.09              | 0.81 | 0.83 | 0.84  |
|                                                                                               | 0.97              | 0.37 | 0.41 | 0.34  |
|                                                                                               | 0.44              | 0.57 | 0.64 | 0.61  |
|                                                                                               | 0.82              | 0.63 | 0.65 | 0.63  |
| Slownes (walking difficulties) yes/no                                                         | 1.59              | 1.4  | 137  | 6     |
|                                                                                               | 0.63              | 0.68 | 0.71 | 0.72  |
|                                                                                               | 0.49              | 0.47 | 0.5  | 0.5   |
|                                                                                               | 0.82              | 0.30 | 0.33 | 0.34  |
|                                                                                               | 0.26              | 0.82 | 0.83 | 0.17  |
| HbA1c ≤6.8/>6.8 (median value)                                                                | 2.01              | 2.5  | 141  | 7.2   |
|                                                                                               | 0.29              | 0.49 | 0.61 | 0.73  |
|                                                                                               | 0.75              | 0.70 | 0.51 | 0.43  |
|                                                                                               | 0.49              | 0.55 | 0.68 | 0.64  |
|                                                                                               | 0.57              | 0.65 | 0.58 | 0.54  |
| HbA1c<7/≥7 (cutoff indicating good glucose control according to the international guidelines) | 1.59              | 2.5  | 140  | 7.2   |
|                                                                                               | 0.61              | 0.51 | 0.65 | 0.73  |
|                                                                                               | 0.54              | 0.70 | 0.48 | 0.46  |
|                                                                                               | 0.56              | 0.61 | 0.61 | 0.61  |
|                                                                                               | 0.59              | 0.60 | 0.49 | 0.60  |
| BMI < 25 /≥25                                                                                 | 1.5               | 1.2  | 150  | 38.2  |
|                                                                                               | 0.7               | 0.79 | 0.4  | 0.26  |
|                                                                                               | 0.44              | 0.7  | 0.72 | 0.95  |
|                                                                                               | 0.92              | 0.30 | 0.90 | 0.15  |
|                                                                                               | 0.14              | 0.95 | 0.16 | 0.95  |
| BMI >30/≤30                                                                                   | 1.2               | 0.9  | 148  | 0.8   |
|                                                                                               | 0.80              | 0.93 | 0.42 | 0.88  |
|                                                                                               | 0.28              | 0.22 | 0.64 | 0.17  |
|                                                                                               | 0.56              | 0.76 | 0.51 | 0.6   |
|                                                                                               | 0.54              | 0.53 | 0.55 | 0.5   |
| Dg chronic heart disease/no                                                                   | 1.59              | 1.8  | 142  | 14.6  |
|                                                                                               | 0.65              | 0.54 | 0.68 | 0.58  |
|                                                                                               | 0.57              | 0.51 | 0.59 | 0.58  |
|                                                                                               | 0.65              | 0.5  | 0.62 | 0.6   |

|                                                                                                                   |                    |      |      |      |
|-------------------------------------------------------------------------------------------------------------------|--------------------|------|------|------|
|                                                                                                                   | 0.58               | 0.55 | 0.65 | 0.55 |
| Dg coronary artery disease /no                                                                                    | Cutoff value: 1.89 | 1.3  | 142  | 10.2 |
|                                                                                                                   | Sensitivity: 0.42  | 0.73 | 0.62 | 0.78 |
|                                                                                                                   | Specificity: 0.72  | 0.37 | 0.59 | 0.49 |
|                                                                                                                   | NPV: 0.7           | 0.72 | 0.45 | 0.81 |
|                                                                                                                   | PPV: 0.45          | 0.38 | 0.74 | 0.45 |
| Dg CVD (any of chronic heart disease, coronary artery disease, periphery artery disease, cerebrovascular disease) | 1.24               | 6.2  | 142  | 9.4  |
|                                                                                                                   | 0.79               | 0.14 | 0.68 | 0.67 |
|                                                                                                                   | 0.33               | 0.95 | 0.55 | 0.47 |
|                                                                                                                   | 0.53               | 0.60 | 0.70 | 0.51 |
|                                                                                                                   | 0.62               | 0.67 | 0.52 | 0.63 |
| Dg incontinentio or urogenital disease / no                                                                       | 1.29               | 2.3  | 129  | 10.2 |
|                                                                                                                   | 0.82               | 0.48 | 0.9  | 0.69 |
|                                                                                                                   | 0.37               | 0.66 | 0.18 | 0.45 |
|                                                                                                                   | 0.78               | 0.42 | 0.5  | 0.72 |
|                                                                                                                   | 0.43               | 0.71 | 0.66 | 0.42 |
| Dg anxiety /no                                                                                                    | 1.9                | 4.8  | 137  | 5.2  |
|                                                                                                                   | 0.41               | 0.24 | 0.79 | 0.77 |
|                                                                                                                   | 0.81               | 0.9  | 0.43 | 0.43 |
|                                                                                                                   | 0.47               | 0.44 | 0.76 | 0.55 |
|                                                                                                                   | 0.76               | 0.78 | 0.48 | 0.67 |
| Dg diabetic retinopathy/no                                                                                        | 1.51               | 2.1  | 134  | 28.8 |
|                                                                                                                   | 0.65               | 0.49 | 0.81 | 0.36 |
|                                                                                                                   | 0.48               | 0.6  | 0.4  | 0.77 |
|                                                                                                                   | 0.78               | 0.32 | 0.45 | 0.31 |
|                                                                                                                   | 0.33               | 0.76 | 0.78 | 0.8  |
| Diabetes duration >10 years /≤10 years                                                                            | 1.3                | 1.4  | 134  | 15.6 |
|                                                                                                                   | 0.74               | 0.69 | 0.82 | 0.58 |
|                                                                                                                   | 0.33               | 0.45 | 0.38 | 0.62 |
|                                                                                                                   | 0.71               | 0.43 | 0.52 | 0.42 |
|                                                                                                                   | 0.36               | 0.71 | 0.72 | 0.74 |
| No. of comorbidities >3/≤3                                                                                        | 1.74               | 2.2  | 144  | 4.2  |
|                                                                                                                   | 0.39               | 0.75 | 1    | 0.74 |
|                                                                                                                   | 0.88               | 0.56 | 0.53 | 0.63 |
|                                                                                                                   | 0.06               | 0.98 | 1    | 0.1  |
|                                                                                                                   | 0.98               | 0.08 | 0.13 | 0.98 |
| Metabolic Syndrome (Male)                                                                                         | Cutoff value: 1.3  | 1.4  | 153  | 4.4  |
|                                                                                                                   | Sensitivity: 0.84  | 0.77 | 0.28 | 0.76 |
|                                                                                                                   | Specificity: 0.40  | 0.43 | 0.82 | 0.35 |
|                                                                                                                   | NPV: 0.72          | 0.63 | 0.51 | 0.56 |
|                                                                                                                   | PPV: 0.46          | 0.59 | 0.61 | 0.56 |
| Metabolic Syndrome (Male)                                                                                         | <b>TSH</b>         |      |      |      |
|                                                                                                                   | Cutoff value: 2.17 |      |      |      |
|                                                                                                                   | Sensitivity: 0.77  |      |      |      |
|                                                                                                                   | Specificity: 0.42  |      |      |      |
|                                                                                                                   | NPV: 0.38          |      |      |      |
|                                                                                                                   | PPV: 0.80          |      |      |      |

|                   |                    |      |      |      |
|-------------------|--------------------|------|------|------|
| Metabolic         | 1.3                | 1.3  | 145  | 16.4 |
| Syndrome (Female) | 0.83               | 0.83 | 0.52 | 0.53 |
|                   | 0.35               | 0.35 | 0.61 | 0.53 |
|                   | 0.78               | 0.78 | 0.43 | 0.67 |
|                   | 0.43               | 0.43 | 0.69 | 0.39 |
| Metabolic         | <b>TSH</b>         |      |      |      |
| Syndrome (Female) | Cutoff value: 2.35 |      |      |      |
|                   | Sensitivity: 0.61  |      |      |      |
|                   | Specificity: 1.00  |      |      |      |
|                   | NPV: 0.08          |      |      |      |
|                   | PPV: 1.00          |      |      |      |

---

\*values>80% were considered important.
