# Supplementary material for: A Critical Appraisal of the Diagnostic and Prognostic Utility of the Anti-Inflammatory Marker IL-37 in a Clinical Setting: A Case Study of Patients with Diabetes Type 2
Source: Int J Environ Res Public Health. 2023 Feb 19;20(4):3695. doi: 10.3390/ijerph20043695 (PMC9966907; doi:10.3390/ijerph20043695)
Supplement: Supplementary file 1 [file ijerph-20-03695-s001.zip › Table S5.pdf]

**Table S5.** The area under ROC (AUC) for IL-37 and classical markers of inflammation: NLR, CRP and Haemoglobin, and combinations of markers. NLR is used as the basis for comparison.

| Subgroups                | Inflammatory markers and their combinations | AUC (NLR basic) | p-value according to the NLR |
|--------------------------|---------------------------------------------|-----------------|------------------------------|
| eGFR <45/≥45             | IL-37                                       | 0.60            | 0.40                         |
|                          | <b>NLR</b>                                  | <b>0.67</b>     |                              |
|                          | Hb                                          | 0.72            | 0.68                         |
|                          | CRP                                         | 0.74            | 0.40                         |
|                          | CRP + Hb                                    | 0.75            | 0.52                         |
|                          | NLR + CRP                                   | 0.76            | 0.21                         |
|                          | NLR + Hb                                    | 0.78            | 0.29                         |
|                          | NLR + CRP + Hb                              | 0.79            | 0.23                         |
| eGFR <60/≥60             | Hb+IL-37                                    | 0.45            | 0.04                         |
|                          | CRP                                         | 0.49            | 0.11                         |
|                          | IL-37                                       | 0.54            | 0.36                         |
|                          | Hb                                          | 0.55            | 0.51                         |
|                          | CRP + Hb                                    | 0.55            | 0.51                         |
|                          | <b>NLR</b>                                  | <b>0.60</b>     |                              |
|                          | NLR + Hb                                    | 0.63            | 0.24                         |
| Frailty index 1 or 2 / 0 | CRP                                         | 0.54            | 0.45                         |
|                          | NLR + Hb                                    | 0.54            | 0.41                         |
|                          | NLR + IL-37                                 | 0.56            | 0.63                         |
|                          | Hb + IL-37                                  | 0.57            | 0.70                         |
|                          | Hb                                          | 0.59            | 0.93                         |
|                          | <b>NLR</b>                                  | <b>0.60</b>     |                              |
|                          | IL-37                                       | 0.60            | 0.92                         |
|                          | CRP + Hb                                    | 0.61            | 0.76                         |
|                          | NLR + CRP + Hb                              | 0.63            | 0.46                         |
| Walking difficulties     | IL-37                                       | 0.54            | 0.63                         |
|                          | <b>NLR</b>                                  | <b>0.61</b>     |                              |
|                          | CRP                                         | 0.63            | 0.95                         |
|                          | Hb                                          | 0.74            | 0.39                         |
|                          | NLR+CRP+Hb                                  | 0.77            | 0.27                         |
| HbA1c <7/≥7              | Hb                                          | 0.56            | 0.92                         |
|                          | <b>NLR</b>                                  | <b>0.56</b>     |                              |
|                          | NLR+IL-37                                   | 0.58            | 0.48                         |
|                          | CRP                                         | 0.58            | 0.84                         |
|                          | IL-37                                       | 0.58            | 0.78                         |
|                          | CRP+Hb                                      | 0.60            | 0.61                         |
|                          | Hb+NLR                                      | 0.60            | 0.60                         |
|                          | CRP+IL-37                                   | 0.60            | 0.58                         |
| BMI<30/≥30               | IL-37                                       | 0.50            | 0.87                         |
|                          | <b>NLR</b>                                  | <b>0.51</b>     |                              |
|                          | Hb                                          | 0.53            | 0.81                         |
|                          | NLR+Hb                                      | 0.53            | 0.38                         |
|                          | Hb+IL-37                                    | 0.54            | 0.67                         |
|                          | NLR+CRP                                     | 0.56            | 0.24                         |
|                          | CRP+Hb                                      | 0.58            | 0.25                         |
|                          | CRP                                         | 0.58            | 0.23                         |
| BMI<25/≥25               | Hb                                          | 0.49            | 0.69                         |
|                          | <b>NLR</b>                                  | <b>0.53</b>     |                              |
|                          | NLR+IL-37                                   | 0.58            | 0.50                         |
|                          | IL-37                                       | 0.58            | 0.63                         |
|                          | NLR+CRP                                     | 0.78            | 0.01                         |

|                               |             |             |                 |
|-------------------------------|-------------|-------------|-----------------|
|                               | CRP+Hb      | 0.76        | 0.01            |
|                               | NLR+CRP+Hb  | 0.77        | 0.01            |
|                               | CRP         | 0.78        | 0.02            |
|                               | CRP+IL-37   | 0.79        | 0.01            |
| Dg chronic heart disease/no   | CRP         | 0.50        | 0.07            |
|                               | Hb          | 0.61        | 0.90            |
|                               | IL-37       | 0.61        | 0.95            |
|                               | <b>NLR</b>  | <b>0.62</b> |                 |
|                               | HB + IL-37  | 0.64        | 0.73            |
|                               | NLR + Hb    | 0.65        | 0.35            |
| Dg coronary artery disease/no | CRP         | 0.52        | 0.32            |
|                               | <b>NLR</b>  | <b>0.58</b> |                 |
|                               | Hb          | 0.60        | 0.85            |
|                               | CRP + Hb    | 0.60        | 0.83            |
|                               | NLR + Hb    | 0.63        | 0.28            |
|                               | IL-37       | 0.66        | 0.23            |
|                               | Hb + IL-37  | 0.66        | 0.24            |
| Dg diabetic retinopathy/no    | CRP         | 0.53        | 0.35            |
|                               | IL-37       | 0.55        | 0.56            |
|                               | NLR + IL-37 | 0.59        | 0.81            |
|                               | NLR + Hb    | 0.60        | 1.00            |
|                               | Hb          | 0.60        | 0.86            |
|                               | <b>NLR</b>  | <b>0.60</b> |                 |
| No. of comorbidities >3 / ≤3  | <b>NLR</b>  | <b>0.58</b> |                 |
|                               | CRP         | 0.60        | 0.85            |
|                               | NLR + CRP   | 0.66        | 0.22            |
|                               | CRP + IL-37 | 0.66        | 0.24            |
|                               | Hb          | 0.80        | <b>&lt;0.01</b> |
| Metabolic syndrome / no       | IL-37       | 0.50        | 0.19            |
|                               | Hb          | 0.53        | 0.69            |
|                               | TSH         | 0.51        | 0.51            |
|                               | CRP + TSH   | 0.55        | 0.59            |
|                               | IL-37 + TSH | 0.56        | 0.76            |
|                               | Hb + IL-37  | 0.56        | 0.74            |
|                               | CRP + Hb    | 0.57        | 0.90            |
|                               | CRP         | 0.57        | 0.89            |
|                               | <b>NLR</b>  | <b>0.58</b> |                 |
|                               | NLR + TSH   | 0.58        | 0.97            |
|                               | NLR + Hb    | 0.59        | 0.74            |
| Metabolic syndrome (Females)  | <b>NLR</b>  | <b>0.67</b> |                 |
|                               | CRP         | 0.67        | 0.99            |
|                               | CRP+Hb      | 0.70        | 0.95            |
|                               | TSH+CRP     | 0.75        | 0.72            |
|                               | Hb+IL-37    | 0.76        | 0.86            |
|                               | NLR+Hb      | 0.78        | 0.65            |
|                               | TSH+IL-37   | 0.82        | 0.50            |
|                               | TSH+NLR     | 0.85        | 0.14            |
